1

## Original article

### 2 Title

3 High-risk exposure without personal protective equipment and infection with SARS-CoV-2 in  
4 healthcare workers: results of the CoV-CONTACT prospective cohort

5

### 6 Authors

7 Sarah Tubiana<sup>1,2, 3,\*</sup>, Charles Burdet<sup>1,2,4,\*</sup>, Nadhira Houhou<sup>5</sup>, Michael Thy<sup>1</sup>, Pauline Manchon<sup>1,4</sup>,  
8 François Blanquart<sup>2,6</sup>, Charlotte Charpentier<sup>2,5</sup>, Jérémie Guedj<sup>1,2</sup>, Loubna Alavoine<sup>1</sup>, Sylvie Behillil<sup>7,8</sup>,  
9 Anne Leclercq<sup>9</sup>, Jean-Christophe Lucet<sup>2,10</sup>, Yazdan Yazdanpanah<sup>2,11</sup>, Mikaël Attia<sup>12</sup>, Caroline Demeret<sup>7</sup>,  
10 Thierry Rose<sup>13</sup>, Julia Anna Bielicki<sup>14,15</sup>, Patricia Bruijning-Verhagen<sup>16</sup>, Herman Goossens<sup>17</sup>, Diane  
11 Descamps<sup>2,5</sup>, Sylvie van der Werf<sup>7,8</sup>, Bruno Lina<sup>18,19</sup>, Xavier Duval<sup>1,2</sup>

12 \* Contributed equally

13

14 1 AP-HP, Hôpital Bichat, Centre d'Investigation Clinique, Inserm CIC 1425, F-75018 Paris, France

15 2 Université de Paris, IAME, INSERM, F-75018 Paris, France

16 3 AP-HP, Hôpital Bichat, Centre de Ressources Biologiques, F-75018 Paris, France

17 4 AP-HP, Hôpital Bichat, Département d'Epidémiologie, Biostatistique et Recherche, F-75018 Paris,  
18 France

19 5 AP-HP, Hôpital Bichat, Laboratoire de Virologie, F-75018 Paris, France

20 6 Center for Interdisciplinary Research in Biology (CIRB), Collège de France, CNRS, INSERM, PSL  
21 Research University, Paris, France

22 7 Molecular Genetics of RNA Viruses, Department of Virology, CNRS UMR3569, Université de Paris,  
23 Institut Pasteur, Paris, France

24 8 National Reference Center for Respiratory Viruses, Institut Pasteur, Paris, France

25 9 AP-HP, Beaujon Hospital, Direction des soins, F-92118 Clichy, France.

26 10 AP-HP, Hôpital Bichat, Equipe de Prévention du Risque Infectieux, F-75018 Paris, France

27 11 AP-HP, Hôpital Bichat, Service de Maladies Infectieuses et tropicales, F-75018 Paris, France

28 12 Physique des fonctions biologiques, CNRS UMR3738, Institut Pasteur, Paris, France

29 13 Biologie cellulaire des lymphocytes, INSERM – U1221, Department of Immunology, Institut

30 Pasteur, Paris, France

31 14 Paediatric Infectious Diseases Research Group, Institute for Infection and Immunity, St George's

32 University of London, London SW17 0RE, UK

33 13 Paediatric Pharmacology and Paediatric Infectious Diseases, University of Basel Children's

34 Hospital, Basel, Switzerland

35 16 Julius Center for Health Sciences and Primary Care, University Medical Center Utrecht, Utrecht,

36 The Netherlands

37 17 Laboratory of Medical Microbiology, Vaccine and Infectious Disease Institute, Faculty of Medicine

38 and Health Science, University of Antwerp, Antwerp, Belgium

39 18 CIRI, Centre International de Recherche en Infectiologie, (Team VirPath), Univ Lyon, Inserm,

40 U1111, Université Claude Bernard Lyon 1, CNRS, UMR5308, ENS de Lyon, F-69007, Lyon, France

41 19 Laboratoire de Virologie, Centre National de Référence des Virus des infections respiratoires (dont

42 la grippe), Institut des Agents Infectieux, Groupement Hospitalier Nord, Hospices Civils de Lyon,

43 69004, Lyon, France

44

#### 45 **Keywords**

46 SARS-CoV-2; healthcare workers; high-risk exposure; personal protective equipment; transmission

47

#### 48 **Running title**

49 SARS-CoV-2 infection in healthcare workers

50

#### 51 **Corresponding author**

52 Xavier Duval

53 Centre d'Investigation Clinique

54 Hôpital Bichat Claude Bernard

55 46, rue Henri Huchard

56 75018 Paris, France

57 Tel: +33 1 40 25 71 48

58 Fax : +33 1 40 25 67 76

59 e-mail: [xavier.duval@aphp.fr](mailto:xavier.duval@aphp.fr)

60

61

62 **Word count**

63 2510

64 **Abstract**

65 **Objective:** We aimed to estimate the risk of infection in Healthcare workers (HCWs) following a high-  
66 risk exposure without personal protective equipment (PPE).

67 **Methods:** We conducted a prospective cohort in HCWs who had a high-risk exposure to SARS-CoV-2-  
68 infected subject without PPE. Daily symptoms were self-reported for 30 days, nasopharyngeal swabs  
69 for SARS-CoV-2 RT-PCR were performed at inclusion and at days 3, 5, 7 and 12, SARS-CoV-2 serology  
70 was assessed at inclusion and at day 30. Confirmed infection was defined by positive RT-PCR or  
71 seroconversion, and possible infection by one general and one specific symptom for two consecutive  
72 days.

73 **Results:** Between February 5<sup>th</sup> and May 30<sup>th</sup>, 2020, 154 HCWs were enrolled within 14 days following  
74 one high-risk exposure to either a hospital patient (70/154; 46.1%) and/or a colleague (95/154;  
75 62.5%). At day 30, 25.0% had a confirmed infection (37/148; 95%CI, 18.4%; 32.9%), and 43.9%  
76 (65/148; 95%CI, 35.9%; 52.3%) had a confirmed or possible infection. Factors independently  
77 associated with confirmed or possible SARS-CoV-2 infection were being a pharmacist or  
78 administrative assistant rather than being from medical staff (adjusted OR (aOR)=3.8,  
79 CI95%=1.3;11.2, p=0.01), and exposure to a SARS-CoV-2-infected patient rather than exposure to a  
80 SARS-CoV-2-infected colleague (aOR=2.6, CI95%=1.2;5.9, p=0.02). Among the 26 HCWs with a SARS-  
81 CoV-2-positive nasopharyngeal swab, 7 (26.9%) had no symptom at the time of the RT-PCR positivity.

82 **Conclusions:** The proportion of HCWs with confirmed or possible SARS-CoV-2 infection was high.  
83 There were less occurrences of high-risk exposure with patients than with colleagues, but those were  
84 associated with an increased risk of infection.

85

86 **Main text**

87 **Introduction**

88 Since December 2019, severe acute respiratory syndrome coronavirus 2 (SARS-CoV-2) which causes  
89 COVID-19, rapidly spread around the globe [1, 2]. The difficulty to control its rapid propagation is  
90 related to many factors, including the fact that infectiousness can precede the symptoms onset,  
91 thereby complicating the identification and isolation of infected individuals before they can transmit  
92 the virus [3, 4].

93 Healthcare workers (HCWs) can be infected following a contact with a patient, but also after  
94 interactions with colleagues, or in the community [5-12]. The use of personal protective equipment  
95 (PPE) was rapidly implemented in departments hosting suspected or identified SARS-CoV-2-infected  
96 subjects. However, the atypical presentation of the infection favors high risk contacts between HCW  
97 and unidentified patients in other departments [3], and the large circulation of the virus increases  
98 the risk of infection during interactions with colleagues, during which the use of PPE or social  
99 distancing may be less strictly followed [13].

100 We conducted a prospective cohort study to estimate the risk of infection in HCWs following high-  
101 risk exposure in the hospital, and to evaluate the virological, immunological and clinical outcomes  
102 following exposure.

103

104 **Methods**

105 ***Study design and participants***

106 The CoV-CONTACT study is an ongoing prospective multicenter cohort study including HCWs with  
107 exposure to an “index” SARS-CoV-2-infected person (either a patient or a colleague) whose infection  
108 was virologically proven by a nasopharyngeal RT-PCR and whose exposure was considered at high-  
109 risk of SARS-CoV-2 transmission. HCWs were included in the study in the 14 days following the last  
110 identified high-risk exposure. The present analysis focuses on “contact” subjects enrolled at the

111 >1000 bed Bichat Claude Bernard University Hospital (Paris, France) [14] between March, 3<sup>rd</sup> 2020  
112 and April, 27<sup>th</sup> 2020.

### 113 ***Ethics and regulatory issues***

114 The study was approved by the French National Data Protection Commission (approval #920102),  
115 and the French Ethics committee (CPP-Ile-de-France-6, #2020-A00280-39) and was registered on the  
116 Clinicaltrial.gov registry (NCT04259892). All subjects provided written informed consent.

### 117 ***Definition of high-risk exposure***

118 Exposure was considered to be at high-risk of SARS-CoV-2 transmission if it occurred i) face-to-face,  
119 within one meter and without protective surgical or FFP2/N95 mask, and ii) during a discussion or  
120 while the index had an episode of coughing or sneezing, and iii) in the 72 hours prior to, or following  
121 the virological diagnosis, or during the symptomatic period of the index.

### 122 ***Data collection***

123 Collected characteristics of the index included age, date of the diagnostic nasopharyngeal RT-PCR  
124 and the SARS-CoV-2 viral load [15].

125 The collected characteristics of the contacts included medical history, weight, height, current  
126 medications, and smoking status. The date of the last high-risk exposure, D0, with the index were  
127 also recorded, as well as the cumulative exposure duration.

128 Contacts were followed up for 30 days following D0. Nasopharyngeal swabs were performed at  
129 inclusion, and then at D3, D5, D7 and D12. As inclusion could occur up to 14 days after D0, a  
130 maximum of five nasopharyngeal swabs could be collected. Blood samples were drawn at inclusion  
131 and D30±7d for SARS-CoV-2 serology.

132 A set of general symptoms (fever >38°C, fatigue, myalgia, headache) and specific symptoms (cough,  
133 breathing difficulties, sore throat, nasal congestion, anosmia, diarrhea) was recorded daily from D0  
134 to D30 using self-administered questionnaires. Results of any additional nasopharyngeal swab were

135 collected, as well as the occurrence of hospitalization, or the existence of household contacts  
136 hospitalized for a SARS-CoV-2 infection between D0 and D30.

### 137 ***Virology***

138 The SARS-CoV-2 RT-PCR was performed blinded to contact characteristics and reported symptoms  
139 (see Supplementary appendix).

140 In contacts with clinical signs suggestive of COVID-19 but a negative SARS-CoV-2 RT-PCR and a  
141 negative SARS-CoV-2 serology at D30, a multiplex RT-PCR (QIAstat-Dx Respiratory Panel; Qiagen,  
142 Germany) was retrospectively performed on available aliquots to detect other respiratory pathogens  
143 (see Supplementary appendix).

### 144 ***Serology***

145 SARS-CoV-2 serology was performed blinded to contacts' characteristics and reported symptoms. We  
146 used two methods targeting different SARS-CoV-2 antigens: LuLISA N, an in-house Luciferase-Linked  
147 Immunosorbent assay designed to detect IgG targeted toward SARS-CoV-2 N antigen (unpublished  
148 results) and EuroIMMUN, a commercial immunoassay used for the detection of IgG targeted toward  
149 the SARS-CoV-2 recombinant Spike protein subunit (S1) [16]. A serum was considered as positive for  
150 SARS-CoV-2 antibodies when the signal exceeded the threshold set at 13,402 relative light units per  
151 second (RLU/s) for LuLISA or a 1.1 ratio for EuroIMMUN.

152 For each method, we defined SARS-CoV-2 seroconversion as the apparition of a positive SARS-CoV-2  
153 serology at the D30 visit, or as an at least two-fold increase of the LuLISA signal or EuroIMMUN ratio  
154 between inclusion and D30, in the case of a positive serology at inclusion.

### 155 ***Definition of SARS-CoV-2 infection***

156 Three definitions of SARS-CoV-2 infection were used: (i) "clinically-suspected infection", when the  
157 contact reported at least one general symptom and one specific symptom during two consecutive  
158 days during the 30-day follow-up; (ii) "virologically-proven infection", if the contact had at least one

159 SARS-CoV-2-positive nasopharyngeal swab during the 30-day follow-up; (iii) “immunologically-proven  
160 infection” if the contact exhibited a SARS-CoV-2 seroconversion in any of the two methods.

161 SARS-CoV-2 infection was considered as confirmed if it was virologically or immunologically-proven,  
162 and considered as possible in case of clinically-suspected infection only.

163 The primary endpoint was confirmed or possible SARS-CoV-2 infection, thereafter referred to as  
164 SARS-CoV-2 infection.

### 165 ***Statistical methods***

166 Categorical variables are expressed as counts (percentage) and continuous variables are expressed as  
167 median (IQR). We first estimated the prevalence of SARS-CoV-2 infection among HCWs, with its 95%  
168 confidence intervals computed using the binomial distribution. For the primary endpoint, in case of  
169 missing data for one of the components, the subject was considered as infected if one of the  
170 available components of the endpoint fulfilled the definition of infection, and considered missing  
171 otherwise.

172 We searched for risk factors associated with SARS-CoV-2 infection among HCWs. Variables achieving  
173 a p-value <0.20 in univariate logistic regression analysis were entered into a multivariate logistic  
174 regression analysis. Using a backward selection method, we obtained a final model in which all risk  
175 factors had a p-value <0.05.. A sensitivity analysis was performed after exclusion of the  
176 subpopulation who only met the definition of a possible SARS-CoV-2 infection.

177 We then studied the kinetics of the SARS-CoV-2 infection in participants with virologically-proven and  
178 clinically-suspected infection. We analyzed the SARS-CoV-2 viral load as a function of time from  
179 symptom onset using a quadratic regression model..

180 Analyses were performed with R v3.5 (R Foundation for Statistical Computing, Vienna, Austria). All  
181 tests were two-sided with a type-I error fixed to 0.05.

182



183

## 184 **Results**

### 185 ***Contacts characteristics and type of exposure***

186 Overall, 154 HCWs exposed to 44 COVID-19 index subjects were included. The median age of these  
187 contacts was 35 years (IQR 29.0; 46.8), 35/154 were male (22.7 %). High-risk exposure occurred prior  
188 to the widespread use of masks in the hospital (on March, 18<sup>th</sup>) in 88/154 contacts (57%). In contrast,  
189 the exposure to colleagues increased from 31.8% (28/88) before March, 18<sup>th</sup> to 88.2% (60/68) after  
190 March, 18<sup>th</sup> (2 contacts with combined exposures). Overall 28/154 contacts (18.2%) had a high-risk  
191 exposure with more than one index subject.

192 The median duration of the high-risk exposure period was two days (IQR 0; 3.8), and contacts were  
193 enrolled at a median time of 6.5 days (IQR 4; 8) after D0. Table 1 presents the characteristics of the  
194 included contacts; 51/154 (33.1%) were medical doctors, midwives, or residents; 77/154 (50.0%)  
195 were nurses, nursing assistant, physiotherapists or hospital students.

196 Contacts were exposed to patients (70/152, 46.1%) or colleagues (95/152, 62.5 %) of whom 13/152  
197 (8.6%) were exposed to both patients and colleagues.

198 While the exposure to patients represented 68.2% (60/88) of high-risk exposure before March 18<sup>th</sup>,  
199 this number dropped to only 11.8% (8/68) after March 18<sup>th</sup>. Most contacts had a cumulated exposure  
200 of more than 30 minutes (102/151, 67.5%). In the 95 contacts exposed to an index colleague,  
201 exposure was related to face-to-face discussion (89/95, 93.7%), meetings (26/95, 27.4%), lunch  
202 sharing (20/95, 21.1%), and other (10/95, 10.5%).

### 203 ***Virological, immunological and clinical outcomes***

204 Overall, 26/154 contact subjects (16.9%, 95%CI [11.3%;23.8%]) had at least one SARS-CoV-2-positive  
205 nasopharyngeal swab (see details in supplementary appendix). When positive, the median  
206 nasopharyngeal SARS-CoV-2 viral load was 8.7 log<sub>10</sub> copies/ml (IQR 6.5; 9.4).

207 Overall, 147 of the 154 contacts had both inclusion and D30 sera samples. At inclusion, 15/147 (10%)  
208 contacts had a positive serology by one of the two methods. At D30, 31/147 (21.1%, 95%CI [14.8%;  
209 28.6%]) contacts exhibited a seroconversion. Results obtained by the two serological methods are  
210 presented in Table S1.

211 Based on self-administered questionnaires, 61/151 (40.4%, 95%CI [32.5%; 48.7%]) contacts met the  
212 definition of a clinical infection (see details in supplementary appendix). The median duration of  
213 symptoms was 5.5 days (IQR 3; 9.2).

214 The Figure 1 presents the combination of virological, immunological and clinical outcomes; 28  
215 contacts fulfilled only the clinical definition of infection. In these subjects, the prevalence of  
216 symptoms dropped at day 10, whereas it persisted elevated until day 30 in those with confirmed  
217 infection (Figure 2).

#### 218 ***Proportion of contacts with SARS-CoV-2 infection***

219 At D30, among the 148 contacts with available data, 65 met the criteria of confirmed or possible  
220 SARS-CoV-2 infection (43.9%, 95%CI [35.9%; 52.3%]), confirmed in 37 (25.0%, 95%CI [18.4%; 32.9%]),  
221 and possible (*i.e.*, only clinically-suspected) in 28 (18.9%, 95%CI [13.2%; 26.5%]). Figure S1 presents  
222 the different clusters of exposure from the 44 index subjects. Among the 28 contacts with possible  
223 SARS-CoV-2 infection, multiplex RT-PCR for other respiratory viruses could be performed in 21 and  
224 was negative for 19 patients and positive for two (one bocavirus and one rhinovirus). During follow-  
225 up, one contact with confirmed SARS-CoV-2 infection was hospitalized. There was no hospitalization  
226 for SARS-CoV-2 infection reported in their household contacts.

#### 227 ***Factors associated with SARS-CoV-2 infection***

228 In the multivariable analysis, the variables associated with SARS-CoV-2 infection were being a  
229 pharmacist or administrative assistant (OR=3.8, CI95%=1.3; 11.2, p=0.01) and having a contact with a  
230 SARS-CoV-2-infected patient (OR=2.6, CI95%=1.23; 5.9, p=0.02).

231 The results of the sensitivity analysis excluding contacts having only a possible SARS-CoV-2 infection  
232 provided similar results except for pharmacist or administrative assistants' function (Table S2).

### 233 ***Viral dynamics in infected contacts***

234 The viral load as a function of time since symptom onset reached a maximum at 8.8 log<sub>10</sub> copies/ml 4  
235 days after symptom onset followed by a decline afterwards (Figure 3). Of note, 7/25 subjects had a  
236 positive SARS-CoV-2 nasopharyngeal swab before the symptoms onset and the first positive  
237 nasopharyngeal swab was observed as early as six days before symptoms onset. In eight subjects, the  
238 positive swab was preceded by one negative swab and in two of them, the negative swab was done  
239 after the symptom onset.

240

241

### 242 **Discussion**

243 In this prospective cohort of high-risk exposed HCWs, between 25% and 44% of subjects acquired  
244 SARS-CoV-2 infection at day 30, depending on the definition used to assess infection. Viral shedding  
245 occurred before symptoms onset in 27% of the SARS-CoV-2-positive subjects. The majority of HCWs  
246 were exposed to a SARS-CoV-2-infected colleague (62.5%), and a substantial proportion had a high-  
247 risk contact with a patient (46.1%). Exposure with a SARS-CoV-2-infected patient was significantly  
248 associated with SARS-CoV-2 infection ( $p=0.023$ ).

249 The HCWs included in our analysis reflected the diversity of the hospital workers, [17] offering an  
250 ideal perspective to analyze the risks of infections encountered in a hospital. Following universal  
251 masking for HCWs on March, 18<sup>th</sup> in our hospital, high-risk exposure to SARS-CoV-2-positive patients  
252 dropped from 68.2% to 11.8%, and high-risk exposure to SARS-CoV-2-positive colleagues became  
253 predominant, increasing from 31.8% to 88.2% and making colleagues-to-colleagues transmission a  
254 potentially major route of infection [7]. The profession of the contact subject was associated with  
255 infection, but we did not find any association with the type of activities of the HCWs. Although it is

256 likely that activities involving a close contact with patients favor infection, such association might  
257 have been masked as HCWs could also be infected by colleagues.

258 One of the strengths of our study is its prospective design, with daily self-questionnaire to  
259 characterize symptoms onset and evolution, as well as repeated nasopharyngeal swabs to capture  
260 the time of infection after exposure, and serological assessments at inclusion and at day 30. The 10%  
261 seropositivity of HCWs at inclusion corresponds to the seroprevalence reported in the Paris area in  
262 the general population during this period, [18] and it is plausible that these subjects had been  
263 infected prior to the high-risk exposure identified in the study. Seroconversion was observed in about  
264 a third of exposed HCWs classified as infected, while their nasopharyngeal swabs were negative;  
265 most of these HCWs were symptomatic. Inversely a quarter of the HCWs with a SARS-CoV-2-positive  
266 nasopharyngeal swabs had no detectable antibodies at day 30, despite the use of two serological  
267 techniques. The prospective nature of our analysis allowed us to characterize the time to viral  
268 positivity in the 26 subjects with SARS-CoV-2-positive nasopharyngeal swabs and the relationship  
269 between the viral load and the time since symptom onset. Nasopharyngeal viral load could be  
270 positive before symptom onset, with the first positive viral load obtained as early as six days before  
271 symptom onset, consistent with the estimated 6-day incubation period previously reported [19, 20].

272 In addition to these confirmed infections, we also considered possible infections, as defined by the  
273 presence of one general and one specific symptoms for two consecutive days in subjects with neither  
274 a positive PCR nor seroconversion. Our definition is stricter than what was done in other studies [17,  
275 21-23]. Interestingly we found that the kinetics of symptom onset was very similar in confirmed and  
276 possibly infected subjects, with 20-35% of subjects presenting symptom between day 4 and day 15  
277 after their last high-risk exposure. The possibly infected patients had a lower prevalence of  
278 symptoms as time went by, with a rapid reduction of prevalence around day 15, while subjects with  
279 confirmed infection had a prevalence of symptoms that remained larger than 20% until day 30. The  
280 faster clearance of symptoms in possible infections suggests that these patients had a milder disease,  
281 which would be consistent with the fact that their nasopharyngeal swabs remained negative and that

282 they did not exhibit detectable antibodies. Future analyses, that will include the probabilistic analysis  
283 of their serial negative nasopharyngeal swab results, as well as the study of the immune cellular  
284 response, will provide more conclusive evidence on their infection status [24].

285 A major limitation of our study is the absence of whole genome sequencing comparing the virus of  
286 the index subject and SARS-CoV-2-infected HCW. Therefore, the network of exposures and infection  
287 only suggests that the infection in a subject is the consequence of a high-risk exposure. However,  
288 sequencing would be restricted to RT-PCR positive subjects, which only represent 40% (26/65) of our  
289 population of confirmed and possible infections. Another limitation was that the type of contacts  
290 observed in the study has been modified by universal masking implemented on March, 18<sup>th</sup>, 2020.  
291 After this date, most at risk contacts were between two HCWs, which were less likely, but not  
292 unlikely, to result in SARS-CoV-2 transmission.

293 All together, the rate of transmission observed in HCWs after high-risk exposure, which could be as  
294 large as 44%, and close to a recent report [25], strengthens the conclusion that universal masking of  
295 HCW, both during contacts with patients and colleagues, and at all times, is essential to prevent  
296 HCWs infection and maintain hospital capacities during outbreaks [26].

297 **Contributors**

298 ST, CB, XD, YY, JCL, JB, PB and BL designed the experiments. ST, MT, LA, AL and XD included subjects.  
299 NH, CC, DD, SvW and BL performed the biological analyses. ST, CB, PM, FB, JG and XD analyzed the  
300 data. ST, CB, PM, FB, JG CC, DD, SvW, BL and XD interpreted the results. ST, CB, FB, and XD wrote the  
301 Article. All authors reviewed and approved the manuscript before submission.

302

303 **Funding**

304 The study was founded by Reacting, the French Ministry of Health (PHRC-N COVID-19, project PHRC-  
305 20-0242) and the European Commission (RECoVer, grant agreement 101003589). Some authors  
306 received financial support of the national research agency (ANR) through the ANR-Flash calls for  
307 COVID-19 (TheraCoV ANR-20-COVI-0018)

308

309 **Declaration of interests**

310 The authors have no commercial or other associations that might pose a conflict of interest.

311

312 **Acknowledgments**

313 **CoVCONTACT study group**

314 **Principal investigator:** Duval Xavier

315 **Steering Committee:** Burdet Charles, Duval Xavier, Lina Bruno, Tubiana Sarah, Van Der Werf Sylvie

316 **CoV-CONTACT Clinical Centers:** Abad Fanny, Abry Dominique, Alavoine Loubna, Allain Jean-

317 Sébastien, Amiel-Taieb Karline, Audoin Pierre, Augustin Shana, Ayala Sandrine, Bansard Hélène,

318 Bertholon Frédérique, Boissel Nolwenn, Botelho-Nevers Elisabeth, Bouiller Kévin, Bourgeon Marilou,

319 Boutrou Mathilde, Brick Lysiane, Bruneau Léa, Caumes Eric, Chabouis Agnès, Chan Thien Eric,

320 Chirouze Catherine, Coignard Bruno, Costa Yolande, Costenoble Virginie, Cour Sylvie, Cracowski

321 Claire, Cracowski Jean Luc, Deplanque Dominique, Dequand Stéphane, Desille-Dugast Mireille,

322 Desmarests Maxime, Detoc Maelle, Dewitte Marie, Djossou Felix, Ecobichon Jean-Luc, Elrezi Elise,

323 Faurous William, Fortuna Viviane, Fouchard Julie, Gantier Emilie, Gautier Céline, Gerardin Patrick,  
324 Gerset Sandrine, Gilbert Marie, Gissot Valérie, Guillemain Francis, Hartard Cédric, Hazevis Béatrice,  
325 Hocquet Didier, Hodaj Enkelejda , Ilic-Habensus Emila, Jeudy A, Jeulin Helene, Kane Maty, Kasprzyk  
326 Emmanuelle, Kikoine John, Laine Fabrice, Laviolle Bruno, Lebeaux David, Leclercq Anne, Ledru Eric,  
327 Lefevre Benjamin, Legoas Carole, Legrand Amélie, Legrand Karine, Lehacaut Jonathan, Lehur Claire,  
328 Lemouche Dalila, Lepiller Quentin, Lepuil Séverine, Letienne Estelle, Lucarelli Aude, Lucet Jean-  
329 Christophe, Madeline Isabelle, Maillot Adrien, Malapate Catherine, Malvy Denis, Mandic Milica,  
330 Marty-Quinternet Solène, Meghadecha Mohamed, Mergeay-Fabre Mayka, Mespoulhe Pauline,  
331 Meunier Alexandre, Migaud Maria-Claire, Motiejunaite Justina, Nathalie Gay, Nguyen Duc, Oubbea  
332 Soumaya, Pagadoy Maïder, Paris Adeline, Paris Christophe, Payet Christine, Peiffer-Smadja Nathan,  
333 Perez Lucas, Perreau Pauline, Pierrez Nathalie, Pistone Thierry, Postolache Andreea, Rasoamanana  
334 Patrick, Reminiac Cécile, Rexah Jade, Roche-Gouanvic Elise, Rousseau Alexandra, Schoemaeker  
335 Betty, Simon Sandrine, Soler Catherine, Somers Stéphanie, Sow Khaly, Tardy Bernard, Terzian Zaven,  
336 Thy Michael, Tournier Anne, Tyrode Sandrine, Vauchy Charline, Verdon Renaud, Vernet Pauline,  
337 Vignali Valérie, Waucquier Nawal

338 **Coordination and statistical analyses:** Burdet Charles, Do Thi Thu Huong, Laouéan Cédric, Mentre  
339 France, Pauline Manchon, Tubiana Sarah, Dechanet Aline, Letrou Sophie, Quintin Caroline, Frezouls  
340 Wahiba

341 **Virological lab:** Le Hingrat Quentin, Houhou Nadhira, Damond Florence, Descamps Dianas,  
342 Charpentier Charlotte, Visseaux Benoit, Vabret Astrid, Lina Bruno, Bouscambert Maud, Van Der Werf  
343 Sylvie, Behillil Sylvie, Gaillanne Laurence, Benmalek Nabil, Attia Mikael, Barbet Marion, Demeret  
344 Caroline, Rose Thierry, Petres Stéphane, Escriou Nicolas, Barbet Marion, Petres Stéphane, Escriou  
345 Nicolas, Goyard Sophie

346 **Biological center:** Kafif Ouifiya, Piquard Valentine, Tubiana Sarah

347 **Partners:** RECOVER, REACTING, Santé Publique France (Coignard Bruno, Mailles Alexandra), Agences  
348 régionales de santé (Simondon Anne, Dreyere Marion, Morel Bruno, Vesval Thiphaine)

349 **Sponsor:** Inserm

350 Amat Karine, Ammour Douae, Aqourras Khadija, Couffin-Cadiergues Sandrine, Delmas Christelle,  
351 Desan Vristi, Doute Jean Michel, Esperou H el ene, Hendou Samia, Kouakam Christelle, Le Meut  
352 Guillaume, Lemestre Soizic, Leturque Nicolas, Marcoul Emmanuelle, Nguefang Solange, Roufai Layid e  
353 **Genetic:** Laurent Abel, Sophie Caillat-Zucman  
354 **ClinicalTrial. Gov identification number:** NCT04259892  
355



356 **References**

- 357 1. Dong E, Du H and Gardner L. An interactive web-based dashboard to track COVID-19 in real time.  
358 *Lancet Infect Dis* 2020;20:533-534
- 359 2. Guan WJ, Ni ZY, Hu Y, et al. Clinical Characteristics of Coronavirus Disease 2019 in China. *N Engl J*  
360 *Med* 2020;382:1708-1720
- 361 3. Arons MM, Hatfield KM, Reddy SC, et al. Presymptomatic SARS-CoV-2 Infections and Transmission  
362 in a Skilled Nursing Facility. *N Engl J Med* 2020;382:2081-2090
- 363 4. Cheng HY, Jian SW, Liu DP, Ng TC, Huang WT and Lin HH. Contact Tracing Assessment of COVID-19  
364 Transmission Dynamics in Taiwan and Risk at Different Exposure Periods Before and After  
365 Symptom Onset. *JAMA Intern Med* 2020
- 366 5. Barrett ES, Horton DB, Roy J, et al. Prevalence of SARS-CoV-2 infection in previously undiagnosed  
367 health care workers at the onset of the U.S. COVID-19 epidemic. *medRxiv* 2020
- 368 6. Chou R, Dana T, Buckley DI, Selph S, Fu R and Totten AM. Epidemiology of and Risk Factors for  
369 Coronavirus Infection in Health Care Workers. *Ann Intern Med* 2020
- 370 7. Contejean A, Leporrier J, Canoui E, et al. Comparing dynamics and determinants of SARS-CoV-2  
371 transmissions among health care workers of adult and pediatric settings in central Paris. *Clin*  
372 *Infect Dis* 2020
- 373 8. Lai X, Wang M, Qin C, et al. Coronavirus Disease 2019 (COVID-2019) Infection Among Health Care  
374 Workers and Implications for Prevention Measures in a Tertiary Hospital in Wuhan, China. *JAMA*  
375 *Netw Open* 2020;3:e209666
- 376 9. Qian X, Ren R, Wang Y, et al. Fighting against the common enemy of COVID-19: a practice of  
377 building a community with a shared future for mankind. *Infect Dis Poverty* 2020;9:34
- 378 10. Sikkema RS, Pas SD, Nieuwenhuijse DF, et al. COVID-19 in health-care workers in three hospitals  
379 in the south of the Netherlands: a cross-sectional study. *Lancet Infect Dis* 2020
- 380 11. Team. CC-R. Characteristics of Health Care Personnel with COVID-19 - United States, February 12-  
381 April 9, 2020. *MMWR Morb Mortal Wkly Rep* 2020;69:477-481

- 382 12. Zheng L, Wang X, Zhou C, et al. Analysis of the infection status of the health care workers in  
383 Wuhan during the COVID-19 outbreak: A cross-sectional study. *Clin Infect Dis* 2020
- 384 13. Bielicki JA, Duval X, Gobat N, et al. Monitoring approaches for health-care workers during the  
385 COVID-19 pandemic. *Lancet Infect Dis* 2020
- 386 14. Lescure FX, Bouadma L, Nguyen D, et al. Clinical and virological data of the first cases of COVID-19  
387 in Europe: a case series. *Lancet Infect Dis* 2020;20:697-706
- 388 15. Institut Pasteur PPR-tR-PaftdoS-C-hwwidd-scr-t-r-p-a.
- 389 16. Theel ES, Harring J, Hilgart H and Granger D. Performance Characteristics of Four High-  
390 Throughput Immunoassays for Detection of IgG Antibodies against SARS-CoV-2. *J Clin Microbiol*  
391 2020
- 392 17. Sakurai A, Sasaki T, Kato S, et al. Natural History of Asymptomatic SARS-CoV-2 Infection. *N Engl J*  
393 *Med* 2020
- 394 18. Santé Publique France. Point épidémiologie hebdomadaire.  
395 [https://www.santepubliquefrance.fr/maladies-et-traumatismes/maladies-et-infections-](https://www.santepubliquefrance.fr/maladies-et-traumatismes/maladies-et-infections-respiratoires/infection-a-coronavirus/documents/bulletin-national/covid-19-point-epidemiologique-du-23-juillet-2020)  
396 [respiratoires/infection-a-coronavirus/documents/bulletin-national/covid-19-point-](https://www.santepubliquefrance.fr/maladies-et-traumatismes/maladies-et-infections-respiratoires/infection-a-coronavirus/documents/bulletin-national/covid-19-point-epidemiologique-du-23-juillet-2020)  
397 [epidemiologique-du-23-juillet-2020](https://www.santepubliquefrance.fr/maladies-et-traumatismes/maladies-et-infections-respiratoires/infection-a-coronavirus/documents/bulletin-national/covid-19-point-epidemiologique-du-23-juillet-2020). Accessed July 28, 2020.
- 398 19. Lauer SA, Grantz KH, Bi Q, et al. The Incubation Period of Coronavirus Disease 2019 (COVID-19)  
399 From Publicly Reported Confirmed Cases: Estimation and Application. *Ann Intern Med*  
400 2020;172:577-582
- 401 20. Nie X, Fan L, Mu G, et al. Epidemiological Characteristics and Incubation Period of 7015  
402 Confirmed Cases With Coronavirus Disease 2019 Outside Hubei Province in China. *J Infect Dis*  
403 2020;222:26-33
- 404 21. Council of State and Territorial Epidemiologists. Interim-20-ID-01: standardized surveillance case  
405 definition and national notification for 2019 novel coronavirus disease (COVID-19). 2020  
406 ([https://www.cste.org/resource/resmgr/2020ps/Interim-20-ID-01\\_COVID-19.pdf](https://www.cste.org/resource/resmgr/2020ps/Interim-20-ID-01_COVID-19.pdf)).
- 407 22. Boulware DR, Pullen MF, Bangdiwala AS, et al. A Randomized Trial of Hydroxychloroquine as  
408 Postexposure Prophylaxis for Covid-19. *N Engl J Med* 2020

- 409 23. Kluytmans-van den Bergh MFQ, Buiting AGM, Pas SD, et al. Prevalence and Clinical Presentation  
410 of Health Care Workers With Symptoms of Coronavirus Disease 2019 in 2 Dutch Hospitals During  
411 an Early Phase of the Pandemic. *JAMA Netw Open* 2020;3:e209673
- 412 24. Gallais F, Velay A, Wendling MJ, et al. Intrafamilial Exposure to SARS-CoV-2 Induces Cellular  
413 Immune Response without Seroconversion.  
414 <https://www.medrxiv.org/content/10.1101/2020.06.21.20132449v1> 2020
- 415 25. Houlihan CF, Vora N, Byrne T, et al. Pandemic peak SARS-CoV-2 infection and seroconversion  
416 rates in London frontline health-care workers. *Lancet* 2020;396:e6-e7
- 417 26. Houghton C, Meskell P, Delaney H, et al. Barriers and facilitators to healthcare workers'  
418 adherence with infection prevention and control (IPC) guidelines for respiratory infectious  
419 diseases: a rapid qualitative evidence synthesis. *Cochrane Database Syst Rev* 2020;4:CD013582
- 420
- 421

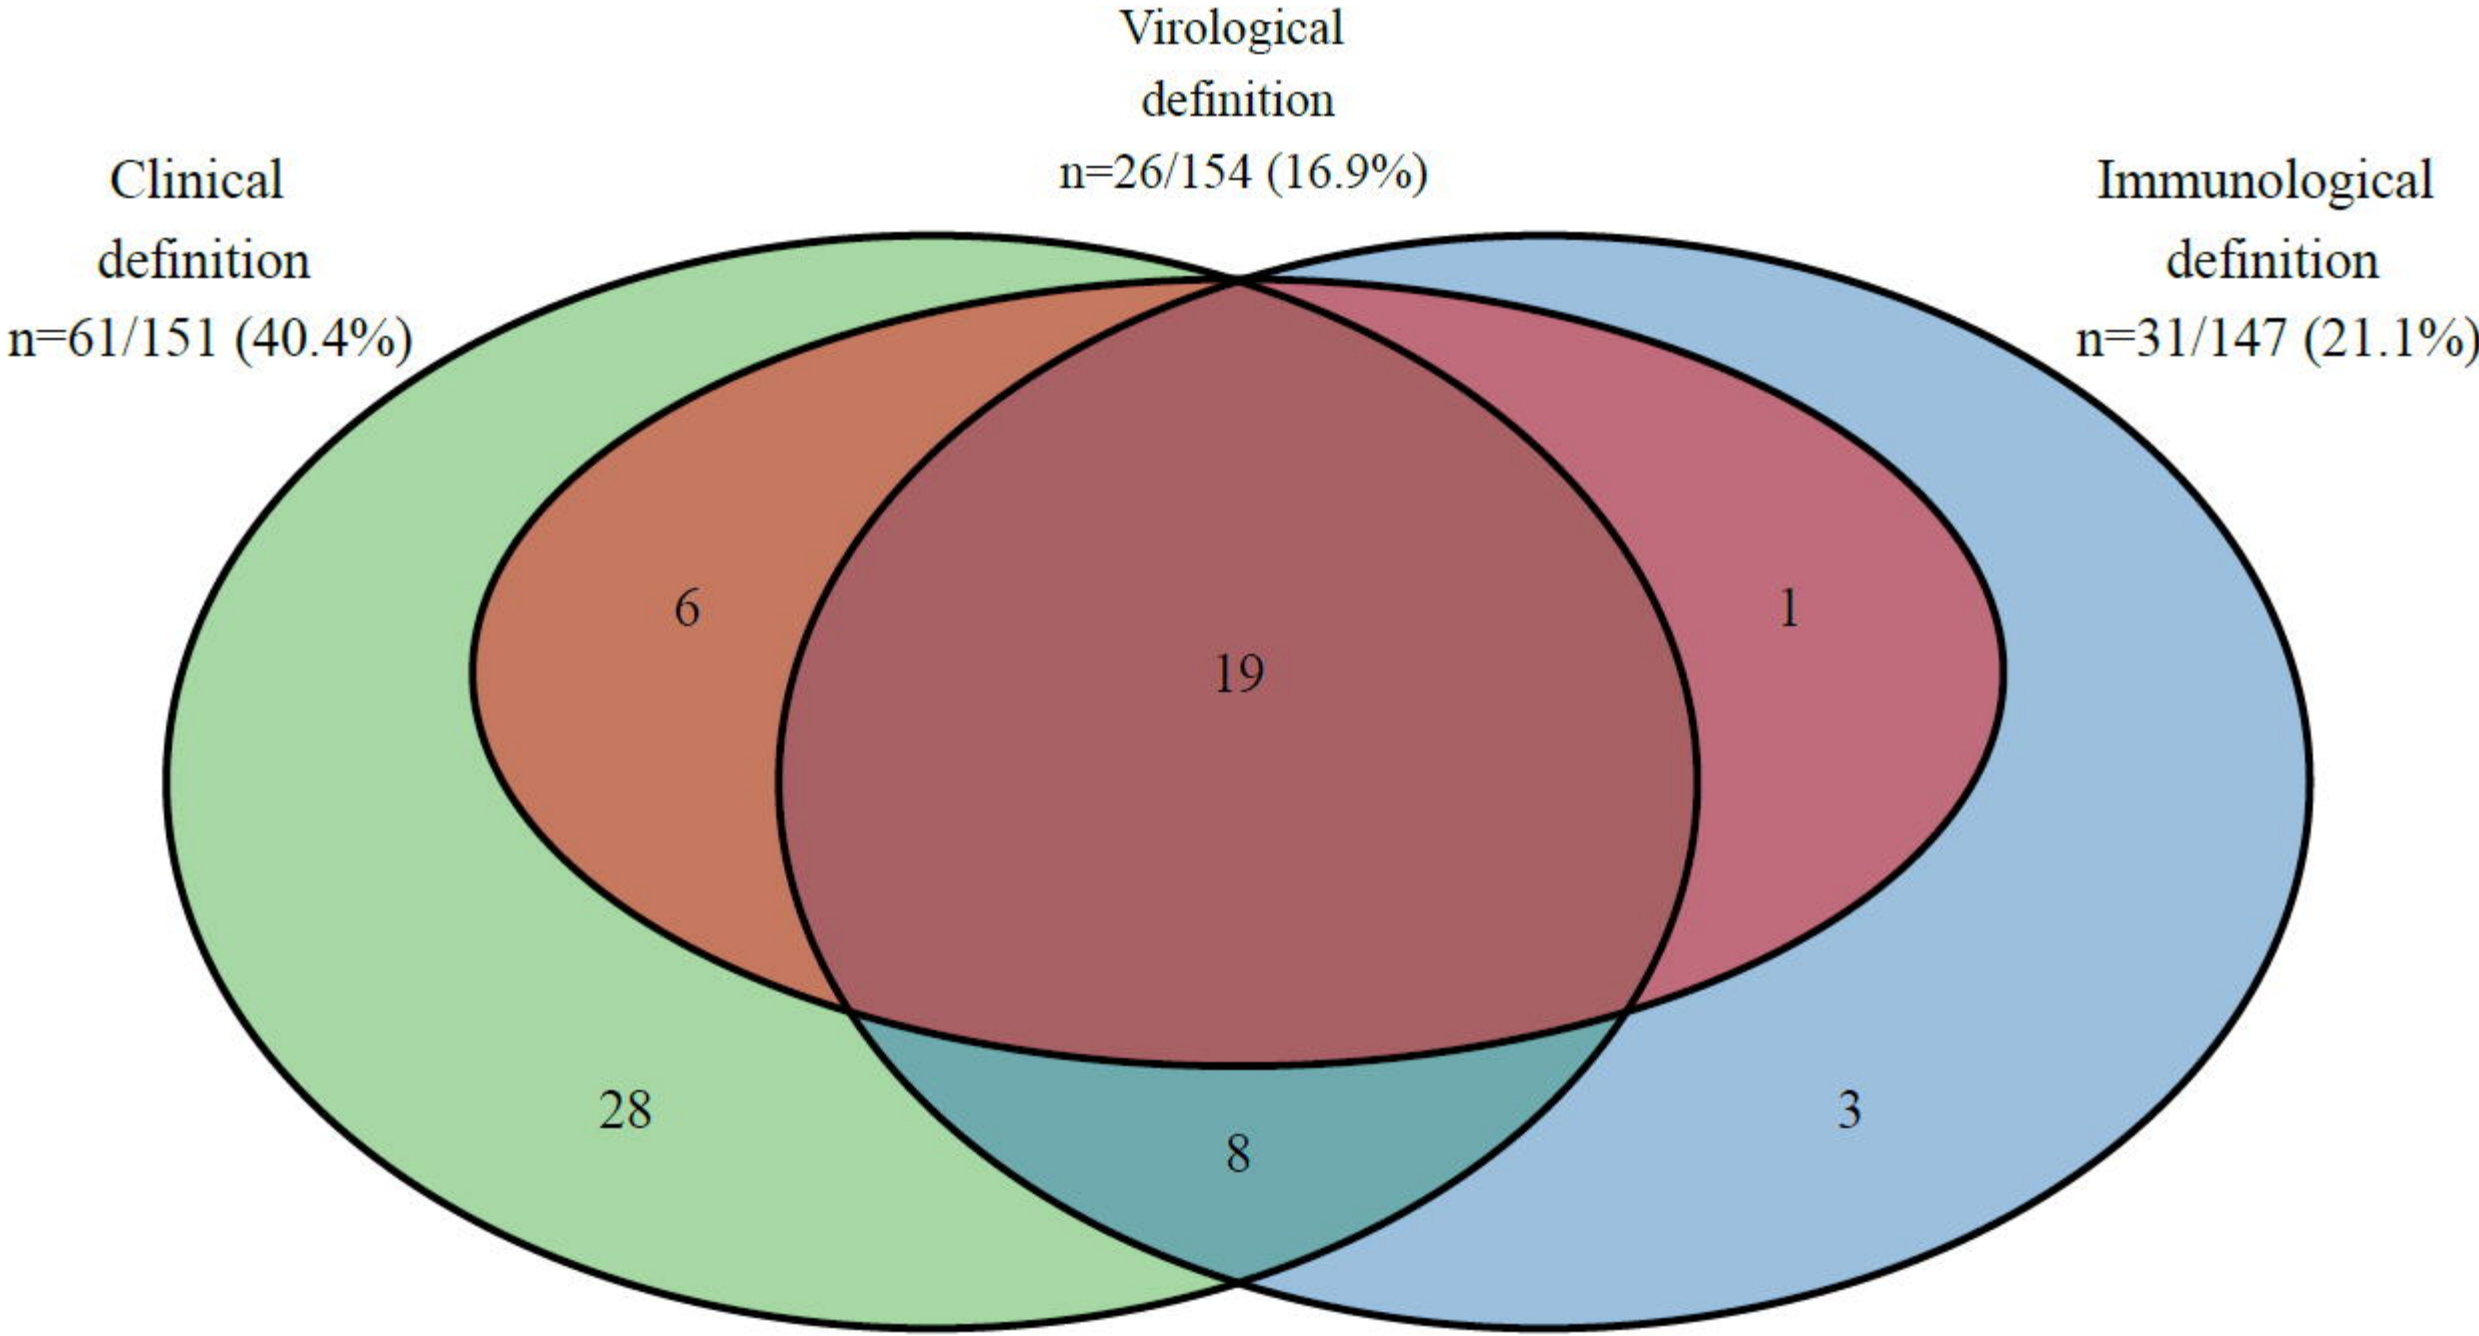

TOTAL INFECTED: N=65/148 (44%)

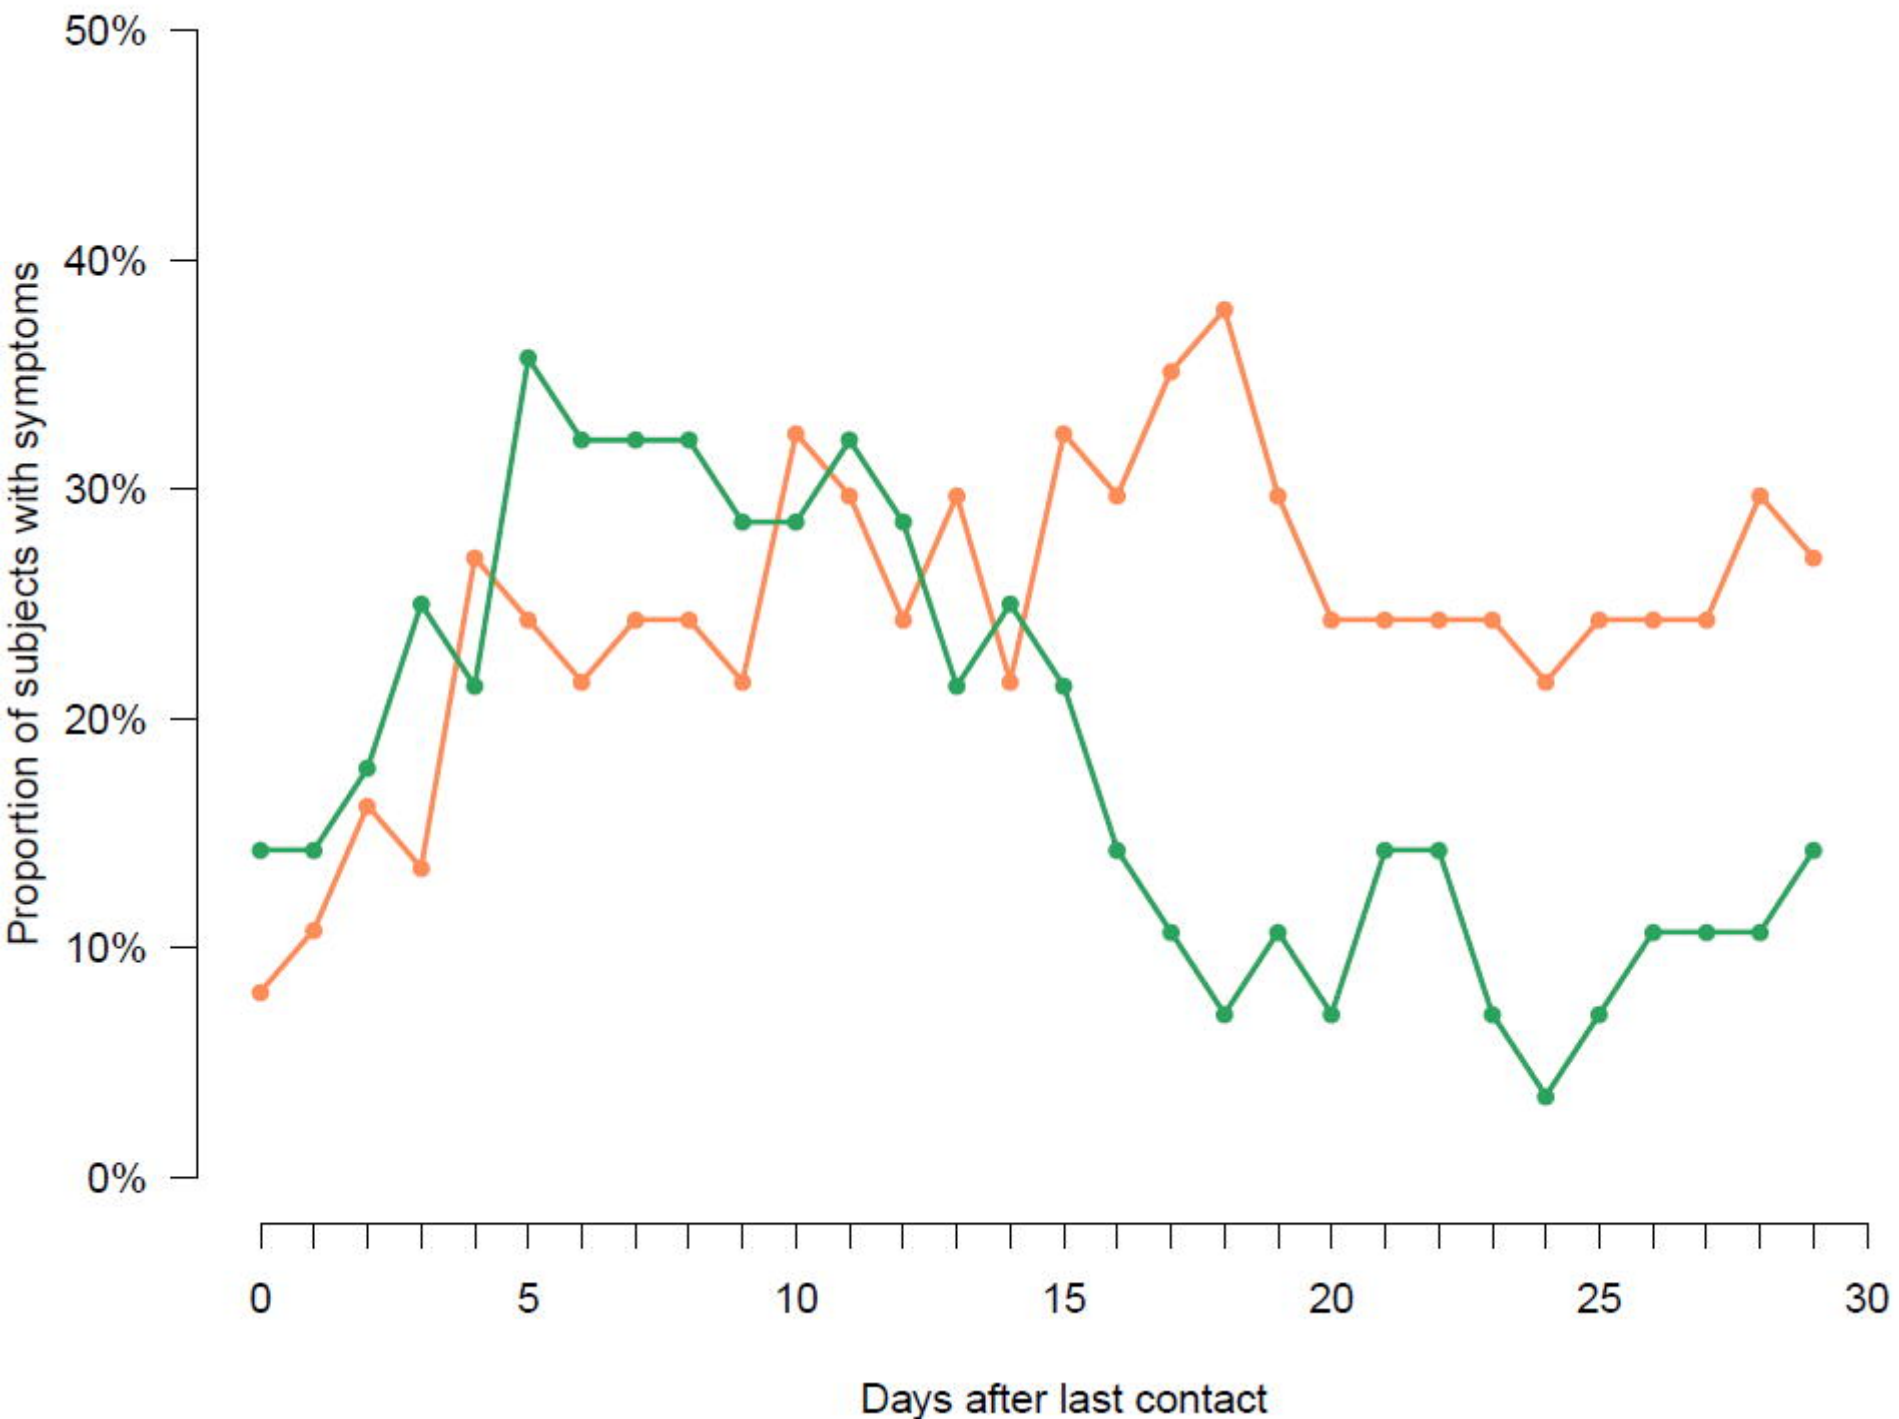

Viral load ( $\log_{10}$  copies / mL)

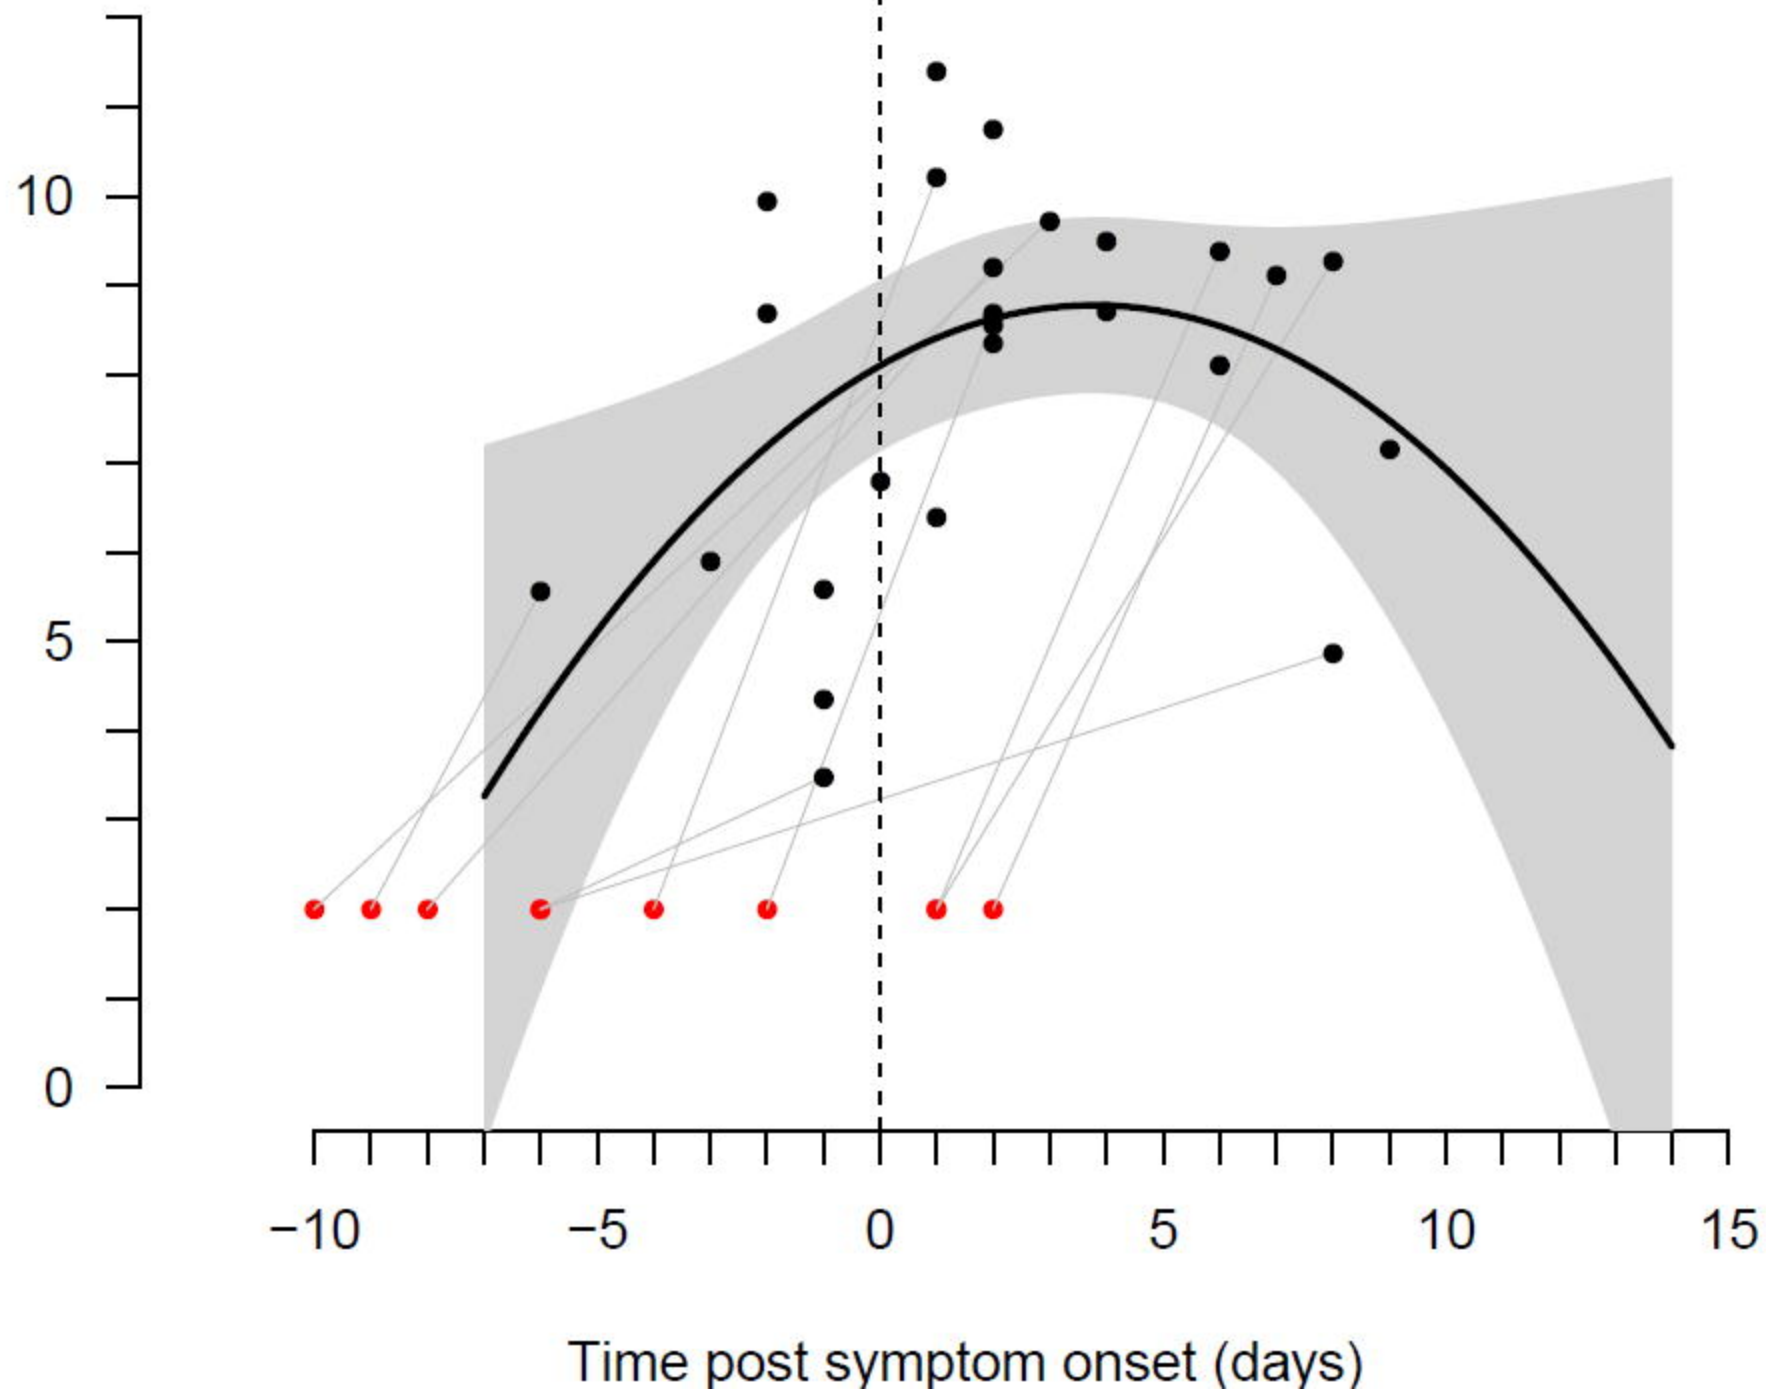

## Figure Legends

### Figure 1

Venn diagram of the clinical, virological and immunological outcomes among the 154 contacts included in the CoV-CONTACT cohort.

SARS-CoV-2 infection could be determined for 148/154 contacts (missing data for immunological and clinical outcomes (n=2), missing data for clinical outcome (n=1), missing data for immunological outcome (n=3).

### Figure 2

Proportions of symptomatic contact subjects among the 154 contacts included in the CoV-CONTACT cohort.

The orange curve corresponds to contacts subjects with confirmed SARS-CoV-2 infection (*i.e.*, virologically- or immunologically-proven, n=37). The green curve corresponds to contacts subjects with possible SARS-CoV-2 infection (*i.e.*, clinically-suspected without viro-immunological confirmation, n=28).

### Figure 3

SARS-CoV-2 viral load in the first positive SARS-CoV-2 nasopharyngeal swab as a function of time since symptom onset, in the 25 healthcare workers with a positive RT-PCR and who met the definition of clinical infection.

The first day when a specific symptom and a general symptom had been reported for two consecutive days was considered as the time of symptom onset.

The black dots show the viral loads at the first positive RT-PCR for each subject. The red dots show the time of the previous negative RT-PCR when present (8 subjects). The black curve is the best fitting second-order polynomial for viral load as a function of time since symptom onset, and the shaded area is the 95% confidence interval.

Supplementary material for : High-risk exposure without personal protective equipment and infection with SARS-CoV-2 in healthcare workers: results of the CoV-CONTACT prospective cohort, by Tubiana *et al.*

## Supplementary Methods

### **Data collection**

In the case of exposure between colleagues working together, the beginning of the exposure period was fixed to 72 hours before the diagnosis of the SARS-CoV-2 infection of the index or the onset of the symptoms in the index, whichever occurred first.

### **SARS-CoV-2 RT-PCR**

Nasopharyngeal swabs were drawn by trained practitioners using Sigma Virocult® swabs (Medical Wire Instrument, UK) and processed within four hours after sampling. Nasopharyngeal swabs were manually discharged in conservation fluid according to the manufacturer recommendations. Viral RNA was extracted from 200 µL of discharge fluid with the MagNA Pure LC Total Nucleic Acid Isolation Kit - Large Volume (Roche Diagnostics) and eluted in 50 µL. Then, SARS-CoV-2 RT-PCR was performed using the RealStar® SARS-CoV-2 RT-PCR kit 1.0 (Altona Diagnostics) according to the manufacturer's instructions. This assay allows the detection and differentiation of lineage B-beta coronavirus (B-βCoV), by targeting the E gene from B-βCoV, and SARS-CoV-2 specific RNA, by targeting the S gene. PCR assays were performed on an ABI 7500 platform (Applied Biosystems®).

A signal with a cycle threshold value above 40 was considered as negative.

### **Other respiratory pathogens RT-PCR**

Detection of other respiratory pathogens was performed using the QIAstat-Dx Respiratory Panel (Qiagen), designed for the detection of adenovirus, bocavirus, coronavirus 229E (CoV 229E), CoV HKU1, CoVNL63, CoV OC43, human metapneumovirus A and B, influenza A (FLU A), FLU A H1, FLU A H3, FLU A H1N1/2009, influenza B, parainfluenza virus 1 (PIV 1), PIV2, PIV 3, PIV 4, human rhinovirus/enterovirus, respiratory syncytial virus A and B, *Bordetella pertussis*, *Chlamydomphila pneumoniae*, and *Mycoplasma pneumoniae*. Approximately 300 µL of discharge fluid was tested according to the manufacturer's instructions.

### **LuLISA**

The LuLISA N assay makes use of a nanobody fused to luciferase for the detection of IgG antibodies binding to the SARS-CoV-2 nucleoprotein (N). Sera were used at a 1:200 dilution. The luciferase signal was measured and expressed in Relative Light Units per second (RLU/s). The threshold of positivity (13,402 RLU/s) was based on the analysis of 231 pre-pandemic sera and defined as the mean + two standard deviations



Supplementary material for : High-risk exposure without personal protective equipment and infection with SARS-CoV-2 in healthcare workers: results of the CoV-CONTACT prospective cohort, by Tubiana *et al.*

## Supplementary Results

### ***Virological, immunological and clinical outcomes***

The median number of nasopharyngeal swabs performed per contact was two (IQR 1;3), and the median time between the last high-risk exposure and the first SARS-CoV-2-positive nasopharyngeal swab was 6.5 days (IQR 4; 8).

Based on self-administered questionnaires, the most frequent symptoms being tiredness (74/151; 49.0%), headache (72/151; 47.7%) and myalgia (48/146; 32.9%) among general symptoms, and nasal congestion (52/148; 35.1%) and cough (51/149; 34.2%) among specific symptoms. The median duration of symptoms was 5.5 days (IQR 3; 9.2).

The median number of symptoms was 5 (IQR 4; 6) among the 28 contacts with possible SARS-CoV-2 infection and was 6 (IQR 4; 10) among those with confirmed SARS-CoV-2 infection.

### ***Factors associated with SARS-CoV-2 infection***

Exposure to a SARS-CoV-2-infected patient was at higher risk of SARS-CoV-2 infection than exposure to a SARS-CoV-2 colleague ( $p=0.023$ , Table 1). Nurses, nurse assistants, physiotherapists and hospital students had a higher risk than medical staff ( $p=0.04$ ), as did pharmacists and administrative assistants ( $p=0.033$ ). In the multivariable analysis, the c-statistic of this final model was 0.67 (95%CI=0.58; 0.76) and the p-value of the Hosmer-Lemeshow test was 0.99, showing no model misspecification.

Supplementary material for : High-risk exposure without personal protective equipment and infection with SARS-CoV-2 in healthcare workers: results of the CoV-CONTACT prospective cohort, by Tubiana *et al.*

### Supplementary Figure S1

Structure of the contact network between the 44 index subjects and the 154 healthcare workers contact subjects with high-risk exposure to SARS-CoV-2 included in the CoV-CONTACT cohort.

Blue circles are health-care workers (either index or contact subjects), green circles are SARS-CoV-2 infected index patients. Circles with crosses represent the COVID-19 index subjects.

The arrows are the exposures; the red ones are the confirmed infections (*i.e.*, virologically- or immunologically-proven, n= 37), the orange ones are the possible infections (*i.e.*, clinically-suspected without viro-immunological confirmation, n=28).

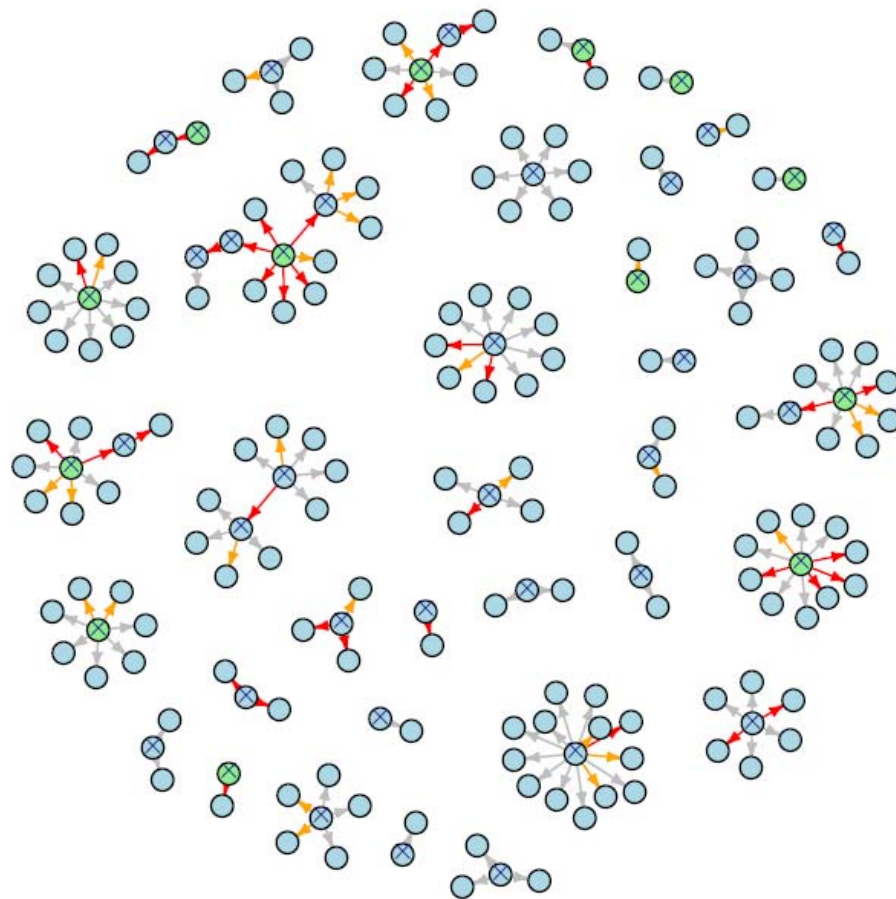

Supplementary material for : High-risk exposure without personal protective equipment and infection with SARS-CoV-2 in healthcare workers: results of the CoV-CONTACT prospective cohort, by Tubiana *et al.*

### Supplementary Table S1

Immunological results obtained by the two serological methods (Lulisa N and EuroIMMUN) in the 147 healthcare workers contact subjects with available data, following a high-risk exposure to SARS-CoV-2 included in the CoV-CONTACT cohort.

|                    |                   | Euroimmun technique |                |       |
|--------------------|-------------------|---------------------|----------------|-------|
|                    |                   | No seroconversion   | Seroconversion | Total |
| Lulisa N technique | No seroconversion | 116                 | 2              | 118   |
|                    | Seroconversion    | 3                   | 26             | 29    |
|                    | Total             | 119                 | 28             | 147   |

Supplementary material for : High-risk exposure without personal protective equipment and infection with SARS-CoV-2 in healthcare workers: results of the CoV-CONTACT prospective cohort, by Tubiana *et al.*

### Supplementary Table S2

Characteristics of the 123 healthcare workers contact subjects with confirmed SARS-CoV-2 infection and without infection following a high-risk exposure included in the CoV-CONTACT cohort.

|                                                                                          | All contacts<br>(N=123) | Contacts with<br>confirmed<br>SARS-CoV-2<br>Infection* (N=37) | Contacts without<br>SARS-CoV-2<br>infection<br>(N=83) | OR [95%CI]        | P-value |
|------------------------------------------------------------------------------------------|-------------------------|---------------------------------------------------------------|-------------------------------------------------------|-------------------|---------|
| <b>Contacts characteristics</b>                                                          |                         |                                                               |                                                       |                   |         |
| Age (year)                                                                               | 35 [29;47.5]            | 35 [29;48]                                                    | 35 [30;47]                                            | 1 [0.97;1.03]     | 0.95    |
| Male gender                                                                              | 33/123 (26.8%)          | 9/37 (24.3%)                                                  | 22/83 (26.5%)                                         | 0.89 [0.35;2.14]  | 0.80    |
| <b>HCW functions</b>                                                                     |                         |                                                               |                                                       |                   |         |
| - Medical doctor / Resident / Midwife                                                    | 47/121 (38.8%)          | 11/36 (30.6%)                                                 | 35/83 (42.2%)                                         | 1 (ref)           |         |
| - Registered Nurse / Certified nurse assistant /<br>Physiotherapists / Hospital students | 62/121 (51.2%)          | 23/36 (63.9%)                                                 | 38/83 (45.8%)                                         | 1.93 [0.83;4.64]  | 0.13    |
| - Pharmacist / Administrative assistants                                                 | 12/121 (9.9%)           | 2/36 (5.6%)                                                   | 10/83 (12%)                                           | 0.64 [0.09;2.91]  | 0.59    |
| <b>Coexisting conditions</b>                                                             |                         |                                                               |                                                       |                   |         |
| - Obesity (BMI>30Kg/m <sup>2</sup> )                                                     | 21/122 (17.2%)          | 7/37 (18.9%)                                                  | 14/83 (16.9%)                                         | 1.15 [0.4;3.06]   | 0.78    |
| - Tobacco use                                                                            | 27/123 (22%)            | 7/37 (18.9%)                                                  | 19/83 (22.9%)                                         | 0.79 [0.28;2]     | 0.63    |
| - Cardiopathy                                                                            | 6/122 (4.9%)            | 3/37 (8.1%)                                                   | 3/83 (3.6%)                                           | 2.35 [0.42;13.28] | 0.31    |
| - Chronic respiratory disease                                                            | 17/122 (13.9%)          | 3/37 (8.1%)                                                   | 14/83 (16.9%)                                         | 0.43 [0.1;1.44]   | 0.21    |
| - Chronic kidney disease                                                                 | 1/122 (0.8%)            | 1/37 (2.7%)                                                   | 0/83 (0%)                                             | NE                | 0.99    |
| - Diabete                                                                                | 1/122 (0.8%)            | 0/37 (0%)                                                     | 1/83 (1.2%)                                           | NE                | 0.99    |
| - Immunosuppressive therapy                                                              | 4/122 (3.3%)            | 1/37 (2.7%)                                                   | 3/83 (3.6%)                                           | 0.74 [0.04;6.01]  | 0.80    |
| - Current pregnancy                                                                      | 1/89 (1.1%)             | 0/28 (0%)                                                     | 1/61 (1.6%)                                           | NE                | 0.99    |
| <b>Type of exposition</b>                                                                |                         |                                                               |                                                       |                   |         |
| Inclusion after the French lockdown                                                      | 55/123 (44.7%)          | 13/37 (35.1%)                                                 | 40/83 (48.2%)                                         | 0.58 [0.26;1.28]  | 0.19    |
| Contact with more than one index                                                         | 22/123 (17.9%)          | 9/37 (24.3%)                                                  | 13/83 (15.7%)                                         | 1.73 [0.65;4.48]  | 0.26    |
| <b>Types of index subjects</b>                                                           |                         |                                                               |                                                       |                   |         |
| - Contacts with SARS-CoV-2-infected HCW(s) only                                          | 66 (54.5%)              | 12 (33.3%)                                                    | 53 (63.9%)                                            | 1 (ref)           |         |
| - Contacts with SARS-CoV-2-infected patient(s) only                                      | 45 (37.2%)              | 19 (52.8%)                                                    | 25 (30.1%)                                            | 3.36 [1.43;8.16]  | 0.0061  |
| - Contacts with SARS-CoV-2-infected HCW(s) and<br>patient(s)                             | 10 (8.3%)               | 5 (13.9%)                                                     | 5 (6.0%)                                              | 4.42 [1.08;18.39] | 0.036   |
| Maximal SARS-CoV-2 viral load in the index subject                                       | 9.3 [7.5;10.8]          | 10.2 [7.5;10.8]                                               | 8.7 [7.5; 10.9]                                       | 1.09 [0.91;1.3]   | 0.36    |
| Cumulated length of exposure > 30 min                                                    | 86/120 (71.7%)          | 25/35 (71.4%)                                                 | 60/82 (73.2%)                                         | 0.92 [0.39;2.28]  | 0.85    |
| <b>Exposure to a SARS-CoV-2-infected patient (N=70)</b>                                  |                         |                                                               |                                                       |                   |         |
| - Care during an aerosol-generating procedure                                            | 4/55 (7.3%)             | 0/24 (0%)                                                     | 3/30 (10%)                                            | NE                | 0.99    |
| - Care without aerosol-generating procedure                                              | 45/55 (81.8%)           | 20/24 (83.3%)                                                 | 25/30 (83.3%)                                         | 1 [0.23;4.51]     | >0.99   |
| - Presence in the patient's room during an<br>aerosol-generating procedure               | 18/55 (32.7%)           | 9/24 (37.5%)                                                  | 9/30 (30.0%)                                          | 1.4 [0.45;4.43]   | 0.56    |
| - Other type of contact                                                                  | 9/55 (16.4%)            | 7/24 (29.2%)                                                  | 2/30 (6.7%)                                           | 5.76 [1.23;41.82] | 0.041   |
| <b>Exposure to a SARS-CoV-2-infected HCW (N=95)</b>                                      |                         |                                                               |                                                       |                   |         |
| - Face-to-face discussion                                                                | 72/76 (94.7%)           | 16/17 (94.1%)                                                 | 55/58 (94.8%)                                         | 0.87 [0.1;18.31]  | 0.91    |
| - Joint meeting                                                                          | 22/76 (28.9%)           | 6/17 (35.3%)                                                  | 16/58 (27.6%)                                         | 1.43 [0.43;4.45]  | 0.54    |
| - Lunch sharing                                                                          | 17/76 (22.4%)           | 3/17 (17.6%)                                                  | 14/58 (24.1%)                                         | 0.67 [0.14;2.45]  | 0.58    |
| - Other type of contact                                                                  | 7/76 (9.2%)             | 1/17 (5.9%)                                                   | 6/58 (10.3%)                                          | 0.54 [0.03;3.51]  | 0.58    |

\* Contacts subjects with a possible SARS-CoV-2 infection (*i.e.*, clinically-suspected without viro-immunological confirmation, n=28) were excluded.

SARS-CoV-2 infection could be determined for 120/123 exposed contacts (missing data for immunological outcome n=3).

\*\* Corticoids, chemotherapy, anti-rejection medication, etc.

Data are presented as n (%) or median [IQR]. NC, not estimable.
